# Supplementary material for: Estimating the fiscal impact of rare diseases using a public economic framework: a case study applied to hereditary transthyretin-mediated (hATTR) amyloidosis
Source: Springer Nature journal article supplement (doi:10.1186/s13023-019-1199-x), 2019-09-18
Supplement: MOESM1 [file 17185504]

**Additional file 1**

**Table S1. Cost data for hATTR by PND stage in Euros over 6 months**

| Resource                            | Unit cost (per mg of drug) | PND I (EUR/6 months) | PND I (EUR/6 months) | PND II (EUR/6 months) | PND IIIa (EUR/6 months) | PND IIIb (EUR/6 months) | PND IV (EUR/6 months) | Source                                                                                                          | Assumptions                                  |
|-------------------------------------|----------------------------|----------------------|----------------------|-----------------------|-------------------------|-------------------------|-----------------------|-----------------------------------------------------------------------------------------------------------------|----------------------------------------------|
|                                     |                            | Mean                 | Mean                 | Mean                  | Mean                    | Mean                    | Mean                  |                                                                                                                 |                                              |
| Tramadol                            | 0.00                       |                      | 2.69                 | 3.20                  | 3.20                    | 3.20                    | 9.71                  | <a href="https://www.medicijnkosten.nl/TRAMADOL 200MG">https://www.medicijnkosten.nl/TRAMADOL 200MG</a>         |                                              |
| Amitriptyline                       | 0.00                       |                      | 3.07                 | 2.74                  | 3.29                    | 3.29                    | 5.01                  | <a href="https://www.medicijnkosten.nl/AMITRIPTYLINE 25MG">https://www.medicijnkosten.nl/AMITRIPTYLINE 25MG</a> |                                              |
| Lyrica (Pregabalin)                 | 0.00                       |                      | 3.08                 | 4.75                  | 5.66                    | 5.11                    | 6.39                  | <a href="https://www.medicijnkosten.nl/LYRICA 300MG">https://www.medicijnkosten.nl/LYRICA 300MG</a>             |                                              |
| Gabapentin                          | 0.00                       |                      | 14.44                | 22.19                 | 26.30                   | 23.83                   | 30.13                 | <a href="https://www.medicijnkosten.nl/GABAPENTINE 300MG">https://www.medicijnkosten.nl/GABAPENTINE 300MG</a>   |                                              |
| Morphine                            | 0.01                       |                      | 0.37                 | 1.41                  | 1.83                    | 1.83                    | 4.75                  | <a href="https://www.medicijnkosten.nl/MORFINE 10MG">https://www.medicijnkosten.nl/MORFINE 10MG</a>             |                                              |
| Iktorivil (Clonazepam)              | 0.05                       |                      | 1.10                 | 3.49                  | 3.49                    | 1.92                    | 11.14                 | <a href="https://www.medicijnkosten.nl/CLONAZEPAM 2MG">https://www.medicijnkosten.nl/CLONAZEPAM 2MG</a>         |                                              |
| Footcare                            | 33.00                      |                      | 20.04                | 29.70                 | 33.00                   | 29.70                   | 35.36                 |                                                                                                                 | Assumption, same as orthotics (Hermans 2018) |
| Midodrine (2,5-10 mg 3 times daily) | 0.31                       |                      | 78.35                | 213.95                | 339.00                  | 399.26                  | 421.86                | <a href="https://www.medicijnkosten.nl/MIDODRINE 5MG">https://www.medicijnkosten.nl/MIDODRINE 5MG</a>           |                                              |

|                                                               |       |  |        |         |         |         |         |                                                                                                                  |                |
|---------------------------------------------------------------|-------|--|--------|---------|---------|---------|---------|------------------------------------------------------------------------------------------------------------------|----------------|
| Fludrocortisone (50-300 microgram daily)                      | 42.56 |  | 59.27  | 139.91  | 219.57  | 240.95  | 247.10  | <a href="https://www.medicijnkosten.nl/FLUDROCORTISON">https://www.medicijnkosten.nl/FLUDROCORTISON</a> 31,25MCG |                |
| Topical Lidocaine patches (700 mg 1-3 times daily)            | 0.00  |  | 0.00   | 0.00    | 0.00    | 0.00    | 0.00    |                                                                                                                  | Not reimbursed |
| Duloxetine (60-120 mg daily)                                  | 0.00  |  | 4.38   | 8.00    | 8.66    | 8.66    | 7.01    | <a href="https://www.medicijnkosten.nl/DULOXETINE">https://www.medicijnkosten.nl/DULOXETINE</a> 60MG             |                |
| Doxepin (75-300 mg daily)                                     | 0.00  |  | 18.64  | 32.03   | 32.03   | 32.03   | 18.90   | <a href="https://www.medicijnkosten.nl/DOXEPINE">https://www.medicijnkosten.nl/DOXEPINE</a> 50MG                 |                |
| Capsaicin cream (0,5 gram 3-4 times daily)                    | 0.05  |  | 357.95 | 1124.97 | 1738.59 | 1738.59 | 2761.29 | <a href="https://www.medicijnkosten.nl/CAPSAICINE">https://www.medicijnkosten.nl/CAPSAICINE</a> 0,075%           |                |
| Paracetamol (500 mg 4-6 times daily)                          | 0.00  |  | 0.00   | 0.00    | 0.00    | 0.00    | 0.00    |                                                                                                                  | Not reimbursed |
| Zopiclone or diazepam - sleeping tablets (5 -15 mg per night) | 0.01  |  | 0.37   | 0.68    | 1.56    | 1.80    | 2.02    | <a href="https://www.medicijnkosten.nl/ZOPICLON">https://www.medicijnkosten.nl/ZOPICLON</a> 7,5MG                |                |
| Orthotics                                                     | 33.00 |  | 0.00   | 272.25  | 354.75  | 358.88  | 363.00  | Hermans 2018                                                                                                     |                |
| <b>Gastrointestinal disorders</b>                             |       |  |        |         |         |         |         |                                                                                                                  |                |
| Flagyl (Metronidazole)                                        | 0.00  |  | 0.00   | 2.41    | 1.61    | 1.61    | 0.00    | <a href="https://www.medicijnkosten.nl/METRONIDAZOL">https://www.medicijnkosten.nl/METRONIDAZOL</a> 500MG        |                |
| Ciprofloxacin                                                 | 0.00  |  | 0.04   | 0.64    | 0.43    | 0.43    | 0.38    | <a href="https://www.medicijnkosten.nl/CIPROFLOXACINE">https://www.medicijnkosten.nl/CIPROFLOXACINE</a> 500MG    |                |

|                                        |        |  |       |        |        |        |        |                                                                                                                         |                  |
|----------------------------------------|--------|--|-------|--------|--------|--------|--------|-------------------------------------------------------------------------------------------------------------------------|------------------|
| Flucloxacillin                         | 0.00   |  | 1.17  | 0.00   | 0.00   | 0.00   | 0.00   | <a href="https://www.medicijnkosten.nl/FLUCLOXACILLINE 1000MG">https://www.medicijnkosten.nl/FLUCLOXACILLINE 1000MG</a> |                  |
| Ampicillin                             | 0.00   |  | 1.63  | 0.00   | 0.00   | 0.00   | 0.00   | <a href="https://www.onmeda.de/AMPICILLIN 1000MG">https://www.onmeda.de/AMPICILLIN 1000MG</a>                           |                  |
| Loperamide                             | 0.05   |  | 16.07 | 54.06  | 56.98  | 63.92  | 81.57  | <a href="https://www.medicijnkosten.nl/LOPERAMIDE 2MG">https://www.medicijnkosten.nl/LOPERAMIDE 2MG</a>                 |                  |
| Sodium picosulphate                    | 0.00   |  | 0.00  | 0.00   | 0.00   | 0.00   | 0.00   |                                                                                                                         | Not reimbursed   |
| Parenteral nutrition (every other day) | 306.94 |  | 0.00  | 112.11 | 112.11 | 504.50 | 403.60 | Puffelen 2018                                                                                                           | Inflated to 2017 |
| Dietician (visits)                     | 27.00  |  | 15.62 | 21.60  | 27.00  | 29.70  | 91.80  | Hermans 2017                                                                                                            | Inflated to 2017 |
| Colostomy (procedure)                  | 347.55 |  | 0.00  | 0.35   | 1.74   | 2.17   | 2.09   | van Wunnik 2012                                                                                                         | Inflated to 2017 |
| Metoclopramide (10 mg 1-3 times daily) | 0.00   |  | 0.52  | 1.02   | 1.52   | 1.58   | 2.58   | <a href="https://www.medicijnkosten.nl/METOCLOPRAMIDE 10MG">https://www.medicijnkosten.nl/METOCLOPRAMIDE 10MG</a>       |                  |
| Codeine (15-60 mg 3-4 times daily)     | 0.02   |  | 20.82 | 81.54  | 143.13 | 156.14 | 232.77 | <a href="https://www.medicijnkosten.nl/CODEINE 15MG">https://www.medicijnkosten.nl/CODEINE 15MG</a>                     |                  |
| Lactulose (15 mg 1-2 times daily)      | 0.00   |  | 0.10  | 0.19   | 0.40   | 0.43   | 0.59   | <a href="https://www.medicijnkosten.nl/LACTULOSE 670MG/ML">https://www.medicijnkosten.nl/LACTULOSE 670MG/ML</a>         |                  |
| Octreotide (12,5-25 microgram daily)   | 67.60  |  | 3.86  | 10.03  | 14.66  | 14.81  | 16.67  | <a href="https://www.medicijnkosten.nl/OCTREOTIDE 0,05MG">https://www.medicijnkosten.nl/OCTREOTIDE 0,05MG</a>           |                  |
| Domperidone (10 mg 1-3 times daily)    | 0.01   |  | 0.24  | 0.97   | 1.27   | 1.52   | 2.10   | <a href="https://www.medicijnkosten.nl/DOMPERIDON 10MG">https://www.medicijnkosten.nl/DOMPERIDON 10MG</a>               |                  |

|                                                                                  |       |  |      |       |       |       |       |                                                                                                                       |                  |
|----------------------------------------------------------------------------------|-------|--|------|-------|-------|-------|-------|-----------------------------------------------------------------------------------------------------------------------|------------------|
| Movicol (1-3 sachets daily)                                                      | 0.12  |  | 2.19 | 3.51  | 4.60  | 5.96  | 7.28  | <a href="https://www.medicijnkosten.nl/MACROGOL_SACHET_13,8G">https://www.medicijnkosten.nl/MACROGOL SACHET 13,8G</a> |                  |
| Senna (15-30 mg daily)                                                           | 0.00  |  | 0.10 | 0.22  | 0.35  | 0.57  | 0.68  | <a href="https://www.medicijnkosten.nl/SENNA_185MG">https://www.medicijnkosten.nl/SENNA 185MG</a>                     |                  |
| Ondansetron (16 mg daily)                                                        | 0.02  |  | 0.48 | 2.41  | 3.11  | 3.18  | 4.49  | <a href="https://www.medicijnkosten.nl/ONDANSETRON_8MG">https://www.medicijnkosten.nl/ONDANSETRON 8MG</a>             |                  |
| <b>Bladder dysfunction</b>                                                       |       |  |      |       |       |       |       |                                                                                                                       |                  |
| Catheterisation (procedure)                                                      | 36.89 |  | 1.84 | 0.81  | 1.48  | 3.23  | 36.89 | Van Den Broek 2011                                                                                                    | Inflated to 2017 |
| Suprapubic catheterisation (procedure)                                           |       |  | 0.00 | 0.00  | 0.00  | 0.00  | 0.00  |                                                                                                                       |                  |
| Antibiotic usage for recurrent UTIs (100 mg 4 times daily)                       | 0.00  |  | 2.22 | 20.89 | 32.02 | 33.24 | 31.91 | <a href="https://www.medicijnkosten.nl/NITROFURANTOINE_50MG">https://www.medicijnkosten.nl/NITROFURANTOINE 50MG</a>   |                  |
| Antibiotic usage for prophylaxis to prevent UTIs (100 mg daily)                  | 0.00  |  | 0.40 | 2.71  | 4.82  | 5.70  | 4.27  | <a href="https://www.medicijnkosten.nl/NITROFURANTOINE_50MG">https://www.medicijnkosten.nl/NITROFURANTOINE 50MG</a>   |                  |
| Anticholinergics, such as Oxybutinin (2,5 mg 3 times daily - 5 mg 4 times daily) | 0.01  |  | 0.50 | 2.56  | 4.29  | 4.72  | 5.73  | <a href="https://www.medicijnkosten.nl/OXYBUTININE_2,5MG">https://www.medicijnkosten.nl/OXYBUTININE 2,5MG</a>         |                  |

|                                        |         |       |        |        |        |        |        |                                                                                                                   |                  |
|----------------------------------------|---------|-------|--------|--------|--------|--------|--------|-------------------------------------------------------------------------------------------------------------------|------------------|
| Tolterodine (2 mg 2 times daily)       | 0.06    |       | 0.67   | 1.67   | 3.42   | 3.42   | 4.08   | <a href="https://www.medicijnkosten.nl/TOLTERODINE 2MG">https://www.medicijnkosten.nl/TOLTERODINE 2MG</a>         |                  |
| <b>Ocular problems</b>                 |         |       |        |        |        |        |        |                                                                                                                   |                  |
| Vitrectomy                             | 1428.15 |       | 9.52   | 71.41  | 0.00   | 0.00   | 57.13  | Brouwer 2010                                                                                                      | Inflated to 2017 |
| Physician, Eye Clinic (visits)         | 93.11   |       | 34.91  | 46.55  | 46.55  | 46.55  | 37.24  | Kostenhandleiding                                                                                                 | Inflated to 2017 |
| Pilocarpine hydrochloride (used daily) | 0.02    |       | 0.00   | 0.00   | 0.00   | 0.00   | 0.00   | <a href="https://www.medicijnkosten.nl/PILOCARPINE 10MG/ML">https://www.medicijnkosten.nl/PILOCARPINE 10MG/ML</a> |                  |
| <b>Other</b>                           |         |       |        |        |        |        |        |                                                                                                                   |                  |
| Citalopram                             | 0.00    |       | 0.55   | 0.37   | 0.44   | 0.55   | 1.53   | <a href="https://www.medicijnkosten.nl/CITALOPRAM 20MG">https://www.medicijnkosten.nl/CITALOPRAM 20MG</a>         |                  |
| Sertraline                             | 0.00    |       | 0.85   | 0.68   | 0.73   | 0.91   | 2.02   | <a href="https://www.medicijnkosten.nl/SERTRALINE 100MG">https://www.medicijnkosten.nl/SERTRALINE 100MG</a>       |                  |
| EPO (4000 IU every other week)         | 29.36   |       | 0.00   | 0.00   | 0.00   | 11.74  | 1.17   | <a href="https://www.medicijnkosten.nl/EPOETINE ALFA 0,5ML">https://www.medicijnkosten.nl/EPOETINE ALFA 0,5ML</a> |                  |
| Knee surgery (procedure)               | 6072.07 |       | 242.88 | 151.80 | 0.00   | 0.00   | 0.00   | Hermans 2017                                                                                                      |                  |
| Social welfare officer (visits)        | 66.50   |       | 13.30  | 33.25  | 49.88  | 49.88  | 66.50  | Kostenhandleiding                                                                                                 | Inflated to 2017 |
| Psychologist (visits)                  | 65.48   | 23.39 | 23.39  | 17.19  | 33.83  | 33.83  | 50.20  | Kostenhandleiding                                                                                                 | Inflated to 2017 |
| Dental care (visits)                   | 21.00   |       | 14.70  | 13.13  | 14.00  | 14.00  | 14.70  | <a href="https://www.tandarts.nl/dental care">https://www.tandarts.nl/dental care</a>                             | Inflated to 2017 |
| Physician, specialist (visits)         | 93.11   | 59.85 | 86.46  | 112.50 | 124.14 | 139.66 | 199.51 | Kostenhandleiding                                                                                                 | Inflated to 2017 |



|                             |         |  |      |        |         |        |         |                                                                                                               |  |
|-----------------------------|---------|--|------|--------|---------|--------|---------|---------------------------------------------------------------------------------------------------------------|--|
| Electric wheelchair         | 5381.00 |  | 0.00 | 0.00   | 336.31  | 874.41 | 1076.20 | Kobelt 2006                                                                                                   |  |
| Manual wheelchair           | 358.00  |  | 0.00 | 0.00   | 85.03   | 120.83 | 0.00    | Hermans 2017                                                                                                  |  |
| Stick                       | 19.95   |  | 0.00 | 8.38   | 11.57   | 0.00   | 0.00    | Hermans 2017                                                                                                  |  |
| Crutch                      | 39.75   |  | 0.00 | 6.63   | 3.81    | 2.82   | 0.00    | Hermans 2017                                                                                                  |  |
| Walking chair               | 109.00  |  | 0.00 | 0.00   | 13.63   | 13.63  | 81.75   | <a href="https://www.vegro.nl/rollator%20move%20light">https://www.vegro.nl/rollator move light</a>           |  |
| Walking frame               | 59.99   |  | 0.00 | 0.75   | 5.85    | 43.64  | 9.75    | <a href="https://www.vegro.nl/looprek%20vast%20verstelbaar">https://www.vegro.nl/looprek vast verstelbaar</a> |  |
| Permobil                    | 1139.00 |  | 0.00 | 0.00   | 142.38  | 256.28 | 740.35  | <a href="https://www.vegro.nl/scootmobiel">https://www.vegro.nl/scootmobiel</a>                               |  |
| Shower chair                | 450.00  |  | 0.00 | 129.38 | 140.63  | 135.00 | 45.00   | Hermans 2017                                                                                                  |  |
| Adjustment, kitchen         | 2694.00 |  | 0.00 | 673.50 | 583.70  | 89.80  | 0.00    | Dorresteyn 2016, Chapter 6                                                                                    |  |
| Adjustment, bathroom        | 2694.00 |  | 0.00 | 853.10 | 1661.30 | 179.60 | 0.00    | Dorresteyn 2016, Chapter 6                                                                                    |  |
| Door opener                 | 18.87   |  | 0.00 | 0.94   | 6.13    | 0.00   | 0.00    | Due to variety of door opener results, we assume that it is similar to the UK price. (1 GBP =1.12196EUR)      |  |
| Rails                       | 37.95   |  | 0.00 | 6.33   | 22.77   | 2.53   | 0.00    | <a href="https://www.efarma.nl/mobile%20rail%2025cm">https://www.efarma.nl/mobile rail 25cm</a>               |  |
| Ramps                       | 169.00  |  | 0.00 | 12.68  | 44.36   | 61.26  | 50.70   | <a href="https://www.vegro.nl/rampkit%202">https://www.vegro.nl/rampkit 2</a>                                 |  |
| Homecare bed including lift | 2129.00 |  | 0.00 | 0.00   | 239.51  | 505.64 | 1383.85 | Kobelt 2006                                                                                                   |  |

**Table S2. Cost data for hATTR patients who also have cardiomyopathy (by severe and non-severeness) in Euros over 6 months**

| Resource                                | Unit cost<br>(per mg of<br>drug) | NTproBNP<br><3000<br>ng/ml | NTproBNP<br>>3000<br>ng/ml | Sources                                                                                                               |
|-----------------------------------------|----------------------------------|----------------------------|----------------------------|-----------------------------------------------------------------------------------------------------------------------|
|                                         |                                  | Mean                       | Mean                       |                                                                                                                       |
| Spirolactone<br>(100-200 mg per<br>day) | € 0.00                           | € 11.64                    | 20.55 €                    | <a href="https://www.medicijnkosten.nl/SPIRONOLACTON100MG">https://www.medicijnkosten.nl/SPIRONOLACTON100MG</a>       |
| Eplerenone (25<br>mg per day)           | € 0.01                           | € 6.30                     | 12.60 €                    | <a href="https://www.medicijnkosten.nl/EPLERENON25MG">https://www.medicijnkosten.nl/EPLERENON25MG</a>                 |
| Furosemida (20-<br>40 mg per day)       | € 0.00                           | € 5.41                     | 7.12 €                     | <a href="https://www.medicijnkosten.nl/FUROSEMIDE20MG">https://www.medicijnkosten.nl/FUROSEMIDE20MG</a>               |
| Bumetanide (1<br>mg per day)            | € 0.03                           | € 2.10                     | € 3.10                     | <a href="https://www.medicijnkosten.nl/BUMETANIDE1MG">https://www.medicijnkosten.nl/BUMETANIDE1MG</a>                 |
| Sando K (2-4<br>times daily)            | € 0.00                           | € 0.07                     | € 0.07                     | <a href="https://www.medicijnkosten.nl/KALIUMCHLORIDE75MG/ML">https://www.medicijnkosten.nl/KALIUMCHLORIDE75MG/ML</a> |
| Bisoprolol (10-20<br>mg per day)        | € 0.00                           | € 3.84                     | € 3.97                     | <a href="https://www.medicijnkosten.nl/BISOPROLOL10MG">https://www.medicijnkosten.nl/BISOPROLOL10MG</a>               |
| Amiodarone (200-<br>600 mg per day)     | € 0.00                           | € 17.53                    | 19.72 €                    | <a href="https://www.medicijnkosten.nl/AMIODARON200MG">https://www.medicijnkosten.nl/AMIODARON200MG</a>               |
| Warfarin (3-9 mg<br>per day)            | € 0.78                           | € 255.09                   | € 255.09                   | <a href="https://www.medicijnkosten.nl/WARFARINE5MG/ML">https://www.medicijnkosten.nl/WARFARINE5MG/ML</a>             |
| Rivaroxaban (20-<br>100 mg per day)     | € 0.11                           | € 401.48                   | € 464.21                   | <a href="https://www.medicijnkosten.nl/RIVAROXABAN20MG">https://www.medicijnkosten.nl/RIVAROXABAN20MG</a>             |
| Dabigatran (110-<br>220 mg per day)     | € 0.01                           | € 54.31                    | 50.13 €                    | <a href="https://www.medicijnkosten.nl/DABIGATRAN110MG">https://www.medicijnkosten.nl/DABIGATRAN110MG</a>             |



|                                                            |               |               |               |                                                                                                     |
|------------------------------------------------------------|---------------|---------------|---------------|-----------------------------------------------------------------------------------------------------|
| Apixaban (5-10 mg per day)                                 | 0.22<br>€     | 98.54<br>€    | 119.44<br>€   | <a href="https://www.medicijnkosten.nl/APIXABAN 5MG">https://www.medicijnkosten.nl/APIXABAN 5MG</a> |
| Echocardiogram (procedure)                                 | 207.38<br>€   | 233.30<br>€   | 293.79<br>€   | Ringborg 2008                                                                                       |
| Electrocardiogram (procedure)                              | 22.52<br>€    | 30.02<br>€    | 35.65 €       | Ringborg 2008                                                                                       |
| Cardiac MRI (procedure)                                    | 222.12<br>€   | 77.74<br>€    | 92.55 €       | Miquel-Cases 2016                                                                                   |
| SA node ablation (procedure)                               | 4,916.72<br>€ | 1,229.18<br>€ | 1,229.18<br>€ | Ringborg 2008                                                                                       |
| iv diuresis (procedure)                                    |               | -<br>€        | -<br>€        |                                                                                                     |
| Heart failure specialist nurse (visits)                    | 12.54<br>€    | 12.54<br>€    | 28.84 €       | Bosmans 2014                                                                                        |
| Cardiac rehabilitation (visits)                            | 156.54<br>€   | 26.09<br>€    | 104.36<br>€   | Kostenhandleiding                                                                                   |
| Cardiac technician (device checks and maintenance; visits) | 12.54<br>€    | 10.66<br>€    | 11.28 €       | Bosmans 2014                                                                                        |
| Accident and emergency (A&E) (visits)                      | 264.99<br>€   | 119.25<br>€   | 304.74<br>€   | Kostenhandleiding                                                                                   |
| Hospitalisations (days)                                    | 487.01<br>€   | 487.01<br>€   | 3,287.35<br>€ | Kostenhandleiding                                                                                   |

|                                                               |               |               |               |               |
|---------------------------------------------------------------|---------------|---------------|---------------|---------------|
| Percutaneous coronary intervention (PCI) (surgical procedure) | 3,657.03<br>€ | -<br>€        | -<br>€        | Ringborg 2008 |
| Cardiac Resynchronization Therapy (CRT)                       | 8,564.16<br>€ | 2,854.72<br>€ | 2,854.72<br>€ | Geisler 2017  |
| Permanent pacemaker                                           | 8,564.16<br>€ | 963.47<br>€   | 1,124.05<br>€ | Geisler 2017  |
| Intraventricular pacemaker                                    | 8,564.16<br>€ | 578.08<br>€   | 785.05<br>€   | Geisler 2017  |
| Implantable cardioverter defibrillator                        | #####         | 1,616.18<br>€ | 1,847.06<br>€ | Ringborg 2008 |
| Implantable loop recorder                                     | 890.89<br>€   | 75.73<br>€    | 14.85 €       | Kanters, 2015 |
| Holter monitors                                               | 125.61<br>€   | 17.35<br>€    | 21.35 €       | Ringborg 2008 |
