# Supplementary material for: Estimating the fiscal impact of rare diseases using a public economic framework: a case study applied to hereditary transthyretin-mediated (hATTR) amyloidosis
Source: Springer Nature journal article supplement (doi:10.1186/s13023-019-1199-x), 2019-09-18
Supplement: MOESM2 [file 17185504]

**Table S3. Cost per hATTR amyloidosis disease state based on best supportive care (BSC) per 6-month period in 2018 € (\*)**

|                       | <b>Disease Stage</b> | <b>HCRU PN</b> | <b>HCRU CM</b> | <b>AEs</b> | <b>Total cost</b> |
|-----------------------|----------------------|----------------|----------------|------------|-------------------|
| NT proBNP< 3000 pg/mL | PND 0                | 1,10           | 9,188          | 355        | 9,653             |
|                       | PND I                | 2,039          | 9,188          | 355        | 11,581            |
|                       | PND II               | 3,147          | 9,188          | 355        | 12,690            |
|                       | PND IIIA             | 5,727          | 9,188          | 355        | 15,270            |
|                       | PND IIIB             | 8,198          | 9,188          | 355        | 17,741            |
|                       | PND IV               | 83,624         | 9,188          | 355        | 93,166            |
| NT proBNP≥3000 pg/mL  | PND 0                | 110            | 12,991         | 355        | 13,457            |
|                       | PND I                | 2,039          | 12,991         | 355        | 15,385            |
|                       | PND II               | 3,147          | 12,991         | 355        | 16,493            |
|                       | PND IIIA             | 5,727          | 12,991         | 355        | 19,073            |
|                       | PND IIIB             | 8,198          | 12,991         | 355        | 21,544            |
|                       | PND IV               | 83,624         | 12,991         | 355        | 96,970            |

(\*) In this calculation the following costs are not considered: Health care resource use one off costs, end of life care, and orthotic liver transplant
